The nucleotide sequence of the *Salmonella typhi* ompC porin gene

Alejandro Venegas\*, Isabel Gómez, Isabel Zaror and Arturo Yudelevich

Unidad de Microbiología y Genética Molecular, Facultad de Ciencias Biológicas, Pontificia Universidad Católica de Chile, Casilla 114-D, Santiago, Chile

Submitted July 7, 1988

Accession no. X07835

SEQUENCE ORIGIN: Two clones were isolated by immunoscreening (1) from a S. typhi Ty2 gene library made in pHC79/UCS257. A BglII fragment subcloned in pUC19 was sequenced by the dideoxy method. The gene codes for an ORF of 377 amino acids (M.W. = 41202).

ACCACGATACACAGTGGCATATGAAAGCCATATAGGCATATACACAGAGGTTATATAC

10 20 30 40 50 60 70 80 90
nTGAAGTTAAAGTACAGTCCCTCCTGATACCACTGCTGCTGATGACGCGCCACACAGTCCGCTGAAATTTATATATAGAACGCAAC
100 110 120 130 140 150 160 170 180
AAATTAACACTGTTTGTAAATTTATGACCTCAGCTACTTCTCTACACACAAAGGACACGACGACGACACCACTACATGCGATCGC
190 200 210 220 230 240 250 260 270
TTCANAGCCAAACGACAGGTTAACGATCAGCTACCGGTTATGCGCACTGGAATATCAAGATTCAGGACACACACGCTGAAAGCAGCAAC
280 290 300 310 320 330 340 350 360
GACTCTGACACGATGTCGCTTTCGCTGCTGATTCCTGCTGACGACGATTCCTTCGATATATGCTGATACCTACGCGATACCTATGAC
370 380 390 400 410 420 430 440 450
GTACCTCTGACACGATTCGCTTTCGCGGATTCGCGCGACACCTACGCGCTGACGATTCCTTATGCGACGCGATGACGCGATATGCT
460 470 480 490 500 510 520 530 540
ACCTACCTACACACGCTTCTTCGATGCTGATGATGCTGCTGCTGCTGCTGCTGCTGCTGCTGCTGCTGCTGCTGCTGCTGCTGCTGCT
550 560 570 580 590 600 610 620 630
AACACACGCTGACGACGCTGCTGCTGCTGCTGCTGCTGCTGCTGCTGCTGCTGCTGCTGCTGCTGCTGCTGCTGCTGCTGCTGCT
640 650 660 670 680 690 700 710 720
GCGCTATACACGCTTACGCTGCTGCTGCTGCTGCTGCTGCTGCTGCTGCTGCTGCTGCTGCTGCTGCTGCTGCTGCTGCTGCTGCT
730 740 750 760 770 780 790 800 810
ACCAGCGCTGATATACGCTGCTGCTGCTGCTGCTGCTGCTGCTGCTGCTGCTGCTGCTGCTGCTGCTGCTGCTGCTGCTGCTGCT
820 830 840 850 860 870 880 890 900
GCGACACGCTGCTGCTGCTGCTGCTGCTGCTGCTGCTGCTGCTGCTGCTGCTGCTGCTGCTGCTGCTGCTGCTGCTGCTGCTGCT
910 920 930 940 950 960 970 980 990
CGCTGCTGCTGCTGCTGCTGCTGCTGCTGCTGCTGCTGCTGCTGCTGCTGCTGCTGCTGCTGCTGCTGCTGCTGCTGCTGCTGCT
1000 1010 1020 1030 1040 1050 1060 1070 1080
GATGCGCGCGCTGCTGCTGCTGCTGCTGCTGCTGCTGCTGCTGCTGCTGCTGCTGCTGCTGCTGCTGCTGCTGCTGCTGCTGCTGCT
1090 1100 1110 1120 1130 1140 1150 1160 1170
GATGCGCTGACACCGCGCTGCTGCTGCTGCTGCTGCTGCTGCTGCTGCTGCTGCTGCTGCTGCTGCTGCTGCTGCTGCTGCTGCTGCT
1180 1190 1200 1210 1220 1230 1240 1250
TTTTCATGCTTATTCGCGCTGCTGCTGCTGCTGCTGCTGCTGCTGCTGCTGCTGCTGCTGCTGCTGCTGCTGCTGCTGCTGCTGCT

FEATURES: The S. typhi ompC coding region and the corresponding protein sequence were 74% and 77% homologous to the E. coli respective sequences (2). The S. typhi OmpC protein is expressed in the outer membrane of E. coli DH5α and other strains.

ACKNOWLEDGMENTS: This work was supported by grants FONDECYT 2026/87 and DIUC 81/86.

\*To whom correspondence should be addressed

REFERENCES:

- 1. Zaror, I., Gómez, I., Castillo, G., Yudelevich, A. & Venegas, A. (1988) FEBS Lett. 229, 77-81.
2. Mizuno, I., Chou, M-Y. & Inouye, M. (1983) J. Biol. Chem. 258, 6932-6940.

Downloaded from https://academic.oup.com/nar/article/16/15/7721/1073502 by guest on 20 April 2024
